1 **Title: The upper respiratory tract microbiome of indigenous Orang Asli in north-**  
2 **eastern Peninsular Malaysia**

3

4 **Authors:** Cleary D. W. \*<sup>1,2</sup>, Morris D. E.<sup>1</sup>, Anderson R. A.<sup>1</sup>, Jones J.<sup>1</sup>, Alattraqchi A. G.<sup>3</sup>,  
5 Rahman N. I. A.<sup>3</sup>, Ismail S., Razali M. S.<sup>3</sup>, Mohd Amin R.<sup>3</sup>, Abd Aziz A.<sup>3</sup>, Esa N. K.<sup>3</sup>,  
6 Amiruddin S.<sup>3</sup>, Chew C. H.<sup>4</sup>, Amat Simin M. H.<sup>5</sup>, Abdullah R.<sup>5</sup>, Yeo C. C.<sup>3</sup> and Clarke S.  
7 C.<sup>1,2,6,7,8</sup>

8

9 **Affiliations:**

10 <sup>1</sup>. Faculty of Medicine and Institute for Life Sciences, University of Southampton,  
11 Southampton, UK

12 <sup>2</sup>. Southampton NIHR Biomedical Research Centre, University Hospital Southampton NHS  
13 Trust, Southampton, UK

14 <sup>3</sup>. Faculty of Medicine, Universiti Sultan Zainal Abidin, Medical Campus, 20400 Kuala  
15 Terengganu, Terengganu, Malaysia

16 <sup>4</sup>. Faculty of Health Sciences, Universiti Sultan Zainal Abidin, Gong Badak Campus, 21300  
17 Kuala Nerus, Terengganu, Malaysia

18 <sup>5</sup>. Faculty of Applied Social Sciences, Universiti Sultan Zainal Abidin, Gong Badak Campus,  
19 21300 Kuala Nerus, Terengganu, Malaysia.

20 <sup>6</sup>. Global Health Research Institute, University of Southampton, Southampton, UK.

21 <sup>7</sup>. School of Postgraduate Studies, International Medical University, Kuala Lumpur,  
22 Malaysia.

23 <sup>8</sup>. Centre for Translational Research, IMU Institute for Research, Development and  
24 Innovation (IRDI), Kuala Lumpur, Malaysia.

25

26 \*Corresponding author

27 **Abstract (350 words max):**

28

29 Background: Microbiome research has focused on populations that are predominantly of  
30 European descent, and from narrow demographics that do not capture the socio-economic  
31 and lifestyle differences which impact human health. This limits our understanding of  
32 human-host microbiota interactions in their broadest sense. Here we examined the airway  
33 microbiology of the Orang Asli, the indigenous peoples of Malaysia. In addition to exploring  
34 the carriage and antimicrobial resistance of important respiratory pathobionts, we also present  
35 the first investigation of the nasal microbiomes of these indigenous peoples, in addition to  
36 their oral microbiomes.

37

38 Results: A total of 130 participants were recruited to the study from Kampung Sungai  
39 Pergam and Kampung Berua, both sites in the north-eastern state of Terengganu in  
40 Peninsular Malaysia. High levels of *Staphylococcus aureus* carriage were observed,  
41 particularly in the 18-65 age group (n=17/36; 47.2% 95% CI: 30.9-63.5). The highest carriage  
42 of pneumococci was in the <5 and 5 to 17 year olds, with 57.1% (4/7) and 49.2% (30/61)  
43 respectively. Sixteen pneumococcal serotypes were identified, the most common being the  
44 non-vaccine type 23A (14.6%) and the vaccine type 6B (9.8%). The nasal microbiome was  
45 significantly more diverse in those aged 5-17 years compared to 50+ years ( $p = 0.023$ ). In  
46 addition, samples clustered by age (PERMANOVA analysis of the Bray-Curtis distance,  $p =$   
47 0.001). Hierarchical clustering of Bray-Curtis dissimilarity scores revealed six microbiome  
48 types. The largest cluster (n=28; 35.4%) had a marked abundance of *Corynebacterium*.  
49 Others comprised *Corynebacterium* with *Dolosigranulum*, two clusters were definable by the  
50 presence of *Moraxella*, one with and the other without *Haemophilus*, a small grouping of  
51 *Delftia/Ochrobactum* profiles and one with *Streptococcus*. No *Staphylococcus* profiles were

52 observed. In the oral microbiomes *Streptococcus*, *Neisseria* and *Haemophilus* were dominant.  
53 Lower levels of *Prevotella*, *Rothia*, *Porphyromonas*, *Veillonella* and *Aggregatibacter* were  
54 also among the eight most observed genera.

55

56 **Conclusions:** We present the first study of Orang Asli airway microbiomes and pathobiont  
57 microbiology. Key findings include the prevalence of pneumococcal serotypes that would be  
58 covered by pneumococcal conjugate vaccines if introduced into a Malaysian national  
59 immunisation schedule, and the high level of *S. aureus* carriage. The dominance of  
60 *Corynebacterium* in the airway microbiomes is particularly intriguing given its' consideration  
61 as a potentially protective commensal with respect to acute infection and respiratory health.

62

63 **Keywords:** 16S rRNA; microbiome; upper respiratory tract; antimicrobial resistance;  
64 Malaysia; *Streptococcus pneumoniae*; *Haemophilus influenzae*; *Staphylococcus aureus*;  
65 *Moraxella catarrhalis*; Orang Asli; indigenous people

66 **Background:**

67 Much microbiome research has, to-date, been focused on populations that are predominantly  
68 of European descent, and from demographics that do not capture the socio-economic and  
69 lifestyle challenges which impact human health [1]. The study of non-Western,  
70 unindustrialised populations is therefore an important extension of microbiome research so  
71 that we may understand human-host microbiota interactions in their broadest sense. Notable  
72 endeavours here, which have principally focussed on gut microbiomes, include studies of the  
73 Hadza hunter-gatherers of Tanzania [2], Amerindians of South America [3, 4], agriculturalist  
74 communities in Burkina Faso [5] Malawi and Venezuela [6] and the Cheyenne and Arapaho  
75 Tribes of North America [7]. Fewer studies have gone beyond gut microbiomes to sample  
76 additional body sites, such as those of the airways. The analysis of salivary microbiota of the  
77 Batwa Pygmies [8], and the Yanomami of the Venezuelan Amazon [3] have shown the  
78 benefits of including these body sites where, respectively, previously undiscovered genera  
79 have been identified and novel combinations of taxa described. However, there remains a  
80 paucity of data regarding microbiomes of other anatomical sites of the upper respiratory tract  
81 (URT). With respiratory infectious diseases continuing to be a significant component of  
82 global morbidity and mortality [9], the interest in the microbiome of the upper airways stems  
83 from its' importance in an individual's susceptibility to respiratory infection, in part through  
84 the presence of resilient taxa which prevent colonisation and/or outgrowth of specific  
85 pathobionts [10]. Understanding the variability in airway microbiomes is a key first step to  
86 leveraging these interactions for health. To date no study has undertaken a comprehensive  
87 analysis of the URT microbiome of the indigenous populations of Peninsular Malaysia, the  
88 Orang Asli.

89

90 Although the name Orang Asli was only introduced around 1960 by the British, as an ethnic  
91 group they are believed to be the first settlers of Peninsular Malaysia, moving from Northern  
92 Thailand, Burma and Cambodia 3-8000 years ago. Orang Asli is in fact a catch-all term for  
93 three tribal groups, the Senoi, Proto-Malays and Negrito, each of which in turn can be further  
94 divided into six ethnic groups [11]. They number ~179 000, 0.6% of the population of  
95 Malaysia but are disproportionately impacted by economic marginalisation and  
96 discrimination [12]. As a consequence, nearly 80% of the Orang Asli population are beneath  
97 the poverty line compared to 1.4% of the national population, and this hardship is reflected in  
98 a 20-year lower average life expectancy of just 53 years [13]. Several studies have  
99 highlighted the susceptibility of these populations to specific diseases [14, 15]. More recently  
100 a study of 73 adults from the semi-urbanized Temiar, an Orang Asli tribe of Kampong Pos  
101 Piah, in Perak, examined salivary microbiomes in the context of obesity – a growing concern  
102 and evidence of the epidemiological shifts in disease burden as these communities leave their  
103 more traditional existences [16].

104

105 Here we examined the microbiology of the upper airway of two Orang Asli communities  
106 located in Terengganu state, North-east of Peninsular Malaysia. The nasopharyngeal and  
107 nasal (anterior nares) carriage of important pathobionts was determined by culture, and the  
108 resistance of these isolates to clinically relevant antibiotics tested. We also present the first  
109 investigation of the nasal microbiomes of these indigenous peoples, in addition to their oral  
110 microbiomes.

111 **Results:**

112 A total of 130 participants were recruited to the study, with 68 from Kampung Sungai  
113 Pergam (Site 1) and 62 from Kampung Berua (Site 2) (Figure 1). The age and gender  
114 distribution are shown in Figure 1. Of those for whom age was accurately recorded, 49%  
115 were female and 45% male. There were notable challenges in the recruitment of children  
116 under five years old (accounting for only 11.5% of the total population sampled). All those  
117 with missing age data were adults.

118

119 The carriage prevalence of the four most commonly isolated pathobionts in the anterior nares  
120 and nasopharynx are shown in Figure 2. Here carriage was defined as the isolation of a  
121 pathobiont from either of the two nasal swabs and for visual clarity all adults were combined  
122 into one age group (18-65). The most commonly isolated pathobionts were *S. aureus* and *S.*  
123 *pneumoniae* both with a total of 39 individuals colonised. The highest carriage for *S. aureus*  
124 was in the 18-65 age group at 47.2% (n=17/36; 95%CI: 30.9-63.5), followed by 30%  
125 (n=18/60, 95%CI: 18.4-41.6) in the 5 to 17 year olds. In contrast, the highest carriage of  
126 pneumococci was in the <5 and 5 to 17 year olds, with 57.1% (4/7) and 49.2% (30/61)  
127 respectively. Looking at the latter cases in more detail shows that the average age of a  
128 pneumococcal carrier in this age group was ~9 years old (range: 6-13). The next most carried  
129 bacterium was *H. influenzae*, isolated from seventeen individuals, the majority of which  
130 (88.2%) were in the 5 to 17 years old age group. In contrast, *M. catarrhalis* was rarely  
131 isolated (n=6), as was *N. meningitidis* (2), *P. aeruginosa* (n=3), *K. pneumoniae* (n=6) and β-  
132 haemolytic *Streptococci* (n=7). Carriage and co-carriage are summarised in Table 1. Carriage  
133 of only *S. aureus* or *S. pneumoniae* accounted for 31.5% of the profiles observed. A limited  
134 number of co-carriage incidents were found which included seven and five cases of  
135 pneumococci isolation with *H. influenzae* or *S. aureus* respectively.

136

137 Serotyping of pneumococcal isolates revealed 16 different serotypes (Figure 3). To avoid  
138 repeated sampling bias, if isolates recovered from nose and nasopharyngeal swabs in a single  
139 individual were the same serotype this was only counted once. The most common serotypes  
140 were the non-VT 23A (14.6%) and the VT 6B (9.8%). Overall, five of the 16 pneumococcal  
141 serotypes would be covered by Prevenar 7® (Pfizer, PCV7) (4, 6B, 14, 19F and 23F) with  
142 two additional serotypes covered by Prevenar 13® (Pfizer, PCV13) (3 and 6A). Only four of  
143 the serotypes (4, 14, 19F and 23F) are included in Synflorix® (GSK, PCV10). Six isolates  
144 were not serotypeable. All but one of the vaccine-type pneumococci (a single 23F) were  
145 isolated from the site at Kampung Berua (Site 2).

146

147 The extent of antimicrobial resistance for the key pathobionts is shown in Figure 4. Notable  
148 levels of resistance were observed for *S. aureus* where 73.3% (n=44) of isolates were  
149 resistant to penicillin, 33.0% (n=20) to tetracycline and 18.3% (n=11) to ciprofloxacin.  
150 However, all isolates were sensitive to ceftazidime, and all but one to chloramphenicol. Three of  
151 the *H. influenzae* isolates (15%) were resistant to penicillin, all of which were negative for  $\beta$ -  
152 lactamase activity. Of the *S. pneumoniae*, 17.9% (n=12) were resistant to tetracycline. No  
153 resistance was seen for *M. catarrhalis* against any antibiotic tested. *A. baumannii* were  
154 sensitive to meropenem and ciprofloxacin (n=14). Similarly, all *K. pneumoniae* were  
155 sensitive to all antibiotics tested including ceftazidime and meropenem.

156

157 The microbiome of the nasal (anterior nares) and oral (whole mouth) was examined using  
158 16S rRNA sequencing of the V4 hypervariable region. Here, the median number of  
159 sequences per sample, including negative controls, was 11,431 with a maximum of  
160 1,072,721. Eighteen nasal and two oral samples were excluded based on low numbers of



161 ASVs (<1000). Alpha diversity (Figure 5A and 5B) was similar between all ages apart from  
162 nasal samples from those aged 5-17 and 50-65 where a significantly greater diversity was  
163 observed in the younger group ( $p = 0.0023$ ); although notably fewer samples were available  
164 from the older participants. No clustering was observed using DPCoA for oral samples  
165 (Figure 5C – right column). In contrast, groups are clearly visible for nasal samples (Figure  
166 5C – left column), with stratification based on age. PERMANOVA analysis of the Bray-  
167 Curtis distance showed that this was a significant difference ( $p = 0.001$ ). Examining the most  
168 abundant phyla (Figure 6) showed nasal samples were dominated, as expected, by Firmicutes,  
169 Proteobacteria and Actinobacteria. For oral samples Bacteroidetes was a much more  
170 prevalent phyla in addition to Fusobacteria, although those same three phyla which  
171 dominated the nasal samples were also present at high levels here as well. Hierarchical  
172 clustering of Bray-Curtis dissimilarity scores revealed six clusters that could be characterised  
173 by the dominance of only one or two Genera (Figure 7). The largest cluster ( $n=28$ ; 35.4%)  
174 contained individuals with a marked abundance of *Corynebacterium*, accounting for an  
175 average ASV relative abundance of 73.2% (range: 59.5 – 87.2%). The second largest cluster  
176 ( $n=16$ ; 20.3%) also had a substantial proportion of *Corynebacterium*, in this case with  
177 *Dolosigranulum* as significant co-carried genus. Here, on average, *Corynebacterium*  
178 accounted for 48.88% and *Dolosigranulum* 31.6% of the relative abundance; combined these  
179 Genera accounted for between 71.5 and 89.4% of the ASV relative abundance of this profile.  
180 Two groups were then definable by the presence of *Moraxella*, one with and the other  
181 without *Haemophilus*. In the *Moraxella*-dominated profile, between 48.2 and 75.2% of the  
182 ASV relative abundance could be attributed to this Genus. When combined with  
183 *Haemophilus* this proportion dropped slightly from an average of 58.1% to 41.5% and here  
184 *Haemophilus* accounted for 13.2 to 47.9% of the profile. A small grouping of  
185 *Delftia/Ochrobactum* profiles were also found. The final cluster consisted of only two

186 profiles, where in one *Streptococcus* accounted for 63.8% and the second with  
187 *Streptococcus/Haemophilus* at 25.9 and 52.6% respectively. Interestingly, no *Staphylococcus*  
188 profiles were observed and none that were characterised by *Haemophilus* alone. No  
189 correlation between profile (in terms of genus composition) and culture outcomes for *S.*  
190 *aureus* or *S. pneumoniae* were seen (Figure 7). To determine if the abundance of either genus  
191 was related to culture positivity, the relative abundance of each was compared between  
192 samples from which either *S. aureus* or *S. pneumoniae* was isolated (Supplementary Figure  
193 1). The relative abundance of Staphylococcal ASVs was not significantly different between  
194 groups, however those from whom *S. pneumoniae* were cultured did have a significantly  
195 higher relative abundance of Streptococci ASVs ( $p = 0.016$ ); although this may be due to the  
196 presence of two profiles characterised by a significant dominance of *Streptococcus*. To  
197 explore the differences in microbiomes between the younger and older age groups,  
198 differentially abundant ASVs were identified using DESeq2 (Figure 8). The 5-17 year age  
199 group had ASVs classified as *Haemophilus* (including *H. influenzae*), *Moraxella* and  
200 *Streptococcus*. In contrast, *Propionibacterium*, *Peptoniphilus* and *Corynebacterium* ASVs  
201 were significantly increased in adults.  
202  
203 *Streptococcus*, *Neisseria* and *Haemophilus* dominated the oral microbiota (Figure 9). Lower  
204 levels of *Prevotella*, *Rothia*, *Porphyromonas*, *Veillonella* and *Aggregatibacter* were also  
205 among the eight most observed genera. Streptococcal-dominated profiles were characterised  
206 by 43.7% ( $\pm 15.7\%$ ) relative abundance of ASVs belonging to this genus. Those with a  
207 *Streptococcus/Haemophilus* profile still had 30.7% ( $\pm 7.6\%$ ) Streptococci ASV relative  
208 abundance but with 15.0% ( $\pm 10\%$ ) *Haemophilus*. The final profile, where clear dominance of  
209 one particular genus was observed, were those where *Neisseria* accounted for 30.6% ( $\pm 12.5$ )  
210 of the relative abundance of all ASVs.

211 **Discussion:**

212 As a site that can be colonised by commensals, as well as opportunistic pathogens such as the  
213 pneumococcus [17], *S. aureus* [18] and *H. influenzae* [19], understanding the microbiology of  
214 the upper respiratory tract is key in tackling respiratory disease. The Anna Karenina principle  
215 of microbiomes, that “all healthy microbiomes are similar; each dysbiotic microbiome is  
216 dysbiotic in its own way” is a useful maxim for examining microbiomes in the context of  
217 disease [20]. However, from previous studies of communities that live unique, traditional  
218 lifestyles a clear challenge to the paradigm of health mirroring health has been shown [3, 8].  
219 Here we examined the respiratory microbiomes of Orang Asli communities living traditional  
220 lifestyles in Terengganu, a rural state in the North-east of Peninsular Malaysia. These  
221 communities are known to face specific health challenges to that of the broader population of  
222 Malaysia, a country where respiratory disease is still a significant burden [21]. Our study  
223 showed a high prevalence of *S. aureus* carriage but interestingly not the presence of  
224 Staphylococci-dominated nasal microbiomes. Instead, *Corynebacterium*, with  
225 *Dolosigranulum* and *Moraxella* dominated as commensal flora. We also showed the potential  
226 impact that PCV introduction in Malaysia may have on circulating pneumococcal serotypes.  
227  
228 Although pneumococcal carriage can vary globally between 10 and 90% [22-24], the highest  
229 carriage prevalence is usually seen in young children, particularly those <5 years [24].  
230 Although only a small number of this age group was sampled here (n=7), over half were  
231 colonised suggesting high levels of carriage. Given that in the 5-17 year age group the mean  
232 age was young at ~9 years old the high carriage (50%; 95%CI, 37.3 and 62.7%) seen in this  
233 age group supports this observation, being higher than has been seen elsewhere in older  
234 children [25] and similar to the 60.9% observed in Aboriginal children over 5 years old – a  
235 demographic known to experience high rates of invasive pneumococcal disease (IPD) [26].

236 As expected, the carriage in adults was low at 8.3% (95%CI, 0% to 17.4%), which is similar  
237 to the NP carriage prevalence of 11.1% (95%CI, 9.8 and 12.6%) that has been seen in the  
238 USA [27], but higher than recent surveys in the UK which found a 2.8% (95%CI: 1.2–5.5)  
239 prevalence in this age group [25]. As for serotypes, whilst there is growing epidemiological  
240 data for the region [28], there is limited data for Malaysia. A study of 245 cases of paediatric  
241 IPD between 2014 and 2017 showed that serotypes 14, 6B, 19A, 6A and 19F were the most  
242 common, accounting for ~75% of disease [29]. This is concordant with this study where  
243 serotypes 14 and 6B were also the most common in carriage with 6A and 19F being  
244 identified. Of the non-VT serotypes isolated only 34, 35F and 18A did not feature in those  
245 identified in the IPD study. The lack of 19A is intriguing but we suspect a consequence of the  
246 relatively low sampling. Both PCV10 and PCV13 are available in Malaysia however only in  
247 private practice and therefore the presence of VT serotypes is not unsurprising. These data do  
248 suggest introduction of PCV into the national immunisation programme as planned may  
249 prove efficacious.

250

251 Only one of the children less than 5 years old was culture positive for *H. influenzae* but given  
252 the low numbers in this age group this must be interpreted with caution. Whilst certainly  
253 higher than in the UK where only 6.5% *H. influenzae* carriage was seen in older children  
254 [30], the 25% (95%CI, 14.0 and 40.0%) found here is similar to that observed in other  
255 developing countries such as Kenya [31], but lower than the 52.8% seen in Aboriginal  
256 children aged between 5 and 15 years old [26]. Whether this increased carriage translates into  
257 disease risk is difficult to determine; there is no data on the burden of otitis media among  
258 Orang Asli, although the country wide incidence in children <12 year olds is low at 2.3% for  
259 the Asia-Pacific region [32].

260

261 The prevalence of *M. catarrhalis* at 6.7% (95%CI, 0.35 and 13.0%) was very similar to that  
262 of our previous UK study where 5.7% of the same age group were colonised [30], a level also  
263 observed in other western countries [33]. This is a stark contrast to the 67% in Aboriginal  
264 children of a similar age [26], however this low level of carriage (6%) has been seen in  
265 Warao Amerindians in Venezuela [34] – arguably a similar demographic to the one being  
266 presented here.

267

268 *S. aureus* carriage is known to vary markedly, by age but also by geographic location [35].  
269 Although the lowest prevalence observed here was in <5 year olds (28.6%; 95%CI: 0-62.0),  
270 which is surprising as one would expect the highest carriage would be seen in this age group,  
271 it could be either a feature of the low recruitment or that the average age of this group was  
272 2.5 and carriage is known decline between 1 and 10 [18]. As for the carriage in adults, a  
273 previous study in Malaysia of 384 adults (students with an average age of 25) found a  
274 carriage prevalence of 23.4% [36] which is much lower than the 47.2% in our population of  
275 Orang Asli. A similarly high level of adult carriage (41.7% and 57.8% at two separate  
276 sampling timepoints) was observed in Wayampi Amerindians who, in terms of remote living,  
277 are similar to the Orang Asli [37]. Our own research has previously shown adult carriage at  
278 24.4% in a UK population [30] and thus the differences we observed are unlikely to be  
279 methodological. More likely it is a consequence of greater co-habitation (the average  
280 household size of our communities being 5.2 people) and reduced access to hygiene, both of  
281 which have been highlighted as reasons why *S. aureus* carriage has declined in other parts of  
282 the world [18].

283

284 Of the ESKAPE pathogens isolated and tested only *S. aureus* exhibited any substantial level  
285 of resistance; importantly all isolates were sensitive to methicillin. Whilst there appears to be

286 limited resistance it is important to note that this represents the only data on the AMR in  
287 these communities and is therefore merely a starting point for future studies. This is  
288 particularly important given that AMR burden in indigenous populations has been seen to  
289 increase elsewhere [38].  
290  
291 URT microbiome research has shown that the composition and/or dominance of particular  
292 bacterial taxa can be indicative of nasal community state types (CSTs). Previously, in a study  
293 of adults in the USA, seven CSTs were identified that were characterised by *S. aureus*  
294 (CST1), or other *Staphylococci* (CST3), a mix of Proteobacteria including *Escherichia* and  
295 *Enterobacteriaceae* sp. (CST2), *Corynebacterium* either with *Propionibacterium acnes*  
296 (CST4) or without (CST5), *Moraxella* (CST6) and *Dolosigranulum* (CST7) [39]. It is here  
297 that we see the most startling contrasts to our Orang Asli population. Although we also  
298 identified seven clusters based on what is/are the dominant taxa we did not see anything  
299 resembling CST 1 or 3 (*Staphylococci*), and no CST2. The lack of a *Staphylococcus*  
300 dominated profile is an enigma given the high carriage rate we observed. We hypothesise  
301 that the high prevalence of profiles similar to CST5, *Corynebacterium* dominated, along with  
302 another that is defined by high abundance of both *Corynebacterium* and *Dolosigranulum*, a  
303 composition that has been found in the nasopharynx [40], explains this absence and is based  
304 on previous work showing that *Corynebacterium* reduces *S. aureus* carriage [41]. A similar  
305 interaction may also explain the absence of *Streptococci* [42] – although we recognise in both  
306 cases that our hypothesis requires further testing due to the identification of both *S. aureus*  
307 and pneumococcal carriage among our participants. A *Moraxella* dominated profile similar to  
308 CST6, is also present in the Orang Asli, a profile which has also been observed in healthy  
309 adults in a European setting [43], although we also see a *Moraxella-Haemophilus* profile  
310 which hasn't been described previously. The *Streptococcus* profiles are both from older

311 children (6 and 10 years old) and this not uncommon as a profile among this age group [44].  
312 The significant proportion of individuals who harbour profiles that are being considered to be  
313 potentially protective either in terms of acute respiratory infections [45] or chronic disease  
314 such as asthma [46-48], is intriguing. Lastly, whilst *Delftia* is not uncommon as an oral  
315 bacterium [49], given the common finding of *Delftia* and *Ochrobactum* as common  
316 contaminants in microbiome research [50] we interpret these four samples with extreme  
317 caution. The presence of these profiles is in spite of our efforts to control for such  
318 contaminants through the collection and sequencing of control swabs. Epidemiologically, all  
319 four samples come from adult females, but two each from Kampung Berua and Kampung  
320 Sungai Pergam. The samples are below the 25% quantile for ASV number (n=3831). It is  
321 possible that these reflect true profiles, but it is impossible to rule out process error during  
322 sample handling, extraction and/or sequencing.

323

324 The microbiota recovered from the oral cavity was substantially more diverse than the nasal  
325 samples, as expected [49]. The top three genera were unremarkable in terms of what is  
326 considered to be most commonly observed, mirroring exactly that found in a study of 447  
327 datasets deposited as part of large-scale microbiome projects [51]. A previous study of  
328 Temiar, Orang Asli in Perak found a significant difference in oral microbiota compositions  
329 between males and females [16], however a PERMANOVA analysis of the data presented  
330 here showed no such distinction ( $p = 0.41$ ).

331

332 Whilst this piece of research was highly novel as a first glimpse into the respiratory  
333 microbiology of Orang Asli communities, it could nevertheless have been strengthened in a  
334 number of ways. Firstly, it was only possible to visit two sites on a single occasion, and to  
335 conduct a pragmatic survey of the communities. As a consequence, the study lacks follow-up

336 and longitudinal data. Whilst we were very successful at recruiting older children and adults,  
337 future studies will have to identify how to recruit greater numbers of younger children in  
338 particular. In terms of pathobiont carriage, serotyping of more than one pneumococcal isolate  
339 from each individual would have enabled a determination of the prevalence of multiple  
340 serotype carriage. Serotyping of *H. influenzae* would also have been informative, although  
341 future work on exploring the genomics of all isolates will address this in more detail. This  
342 additional insight could also be expanded to include all the pathogens/pathobionts isolated.  
343 As with all microbiome research, longitudinal sampling taking into account an individual's  
344 temporal variability, the seasonality and medical history would be desirable.



345 **Conclusions:** Here we present the first study of Orang Asli airway microbiomes and  
346 pathobiont microbiology, including the antimicrobial resistance profiles of ESKAPE  
347 pathogens. Important findings include the prevalence of pneumococcal serotypes that would  
348 be covered by pneumococcal conjugate vaccines, supporting their introduction as part of a  
349 national immunisation programme. The high prevalence of *S. aureus* carriage is noteworthy  
350 and warrants further study. In terms of the airway microbiomes the dominance of  
351 *Corynebacterium*, additionally with *Dolosigranulum* and *Moraxella* in nasal profiles is  
352 particularly intriguing and future work should explore these commensals in the context of  
353 burden and susceptibility to both acute and chronic respiratory conditions in these  
354 communities.

355 **Methods:**

356 Study sites and participants: Two Orang Asli villages were visited in August 2017 –  
357 Kampung Sungai Pergam in Kemaman district and Kampung Berua in Hulu Terengganu  
358 district. Both sites are located in the state of Terengganu which lies in the north-east of  
359 Peninsular Malaysia. Participant recruitment was with consent, across all ages with no  
360 exclusion criteria. Questionnaires were used to capture participant metadata which included  
361 gender, age, number of dwelling co-occupants and occupation in addition to health-related  
362 questions including current or recent (within the last month and last three months) respiratory  
363 symptoms, antibiotic use and vaccination status. Questionnaires were translated into Malay  
364 by A.S.M.H., A.R., M.A.R., and C.C.Y., and conducted by research assistants from the  
365 Faculty of Applied Social Sciences, Universiti Sultan Zainal Abidin, who were trained on  
366 how to administer the questionnaires for the purpose of this study.

367

368 Swab collection: A total of four swabs were taken from each participant. A nasal swab  
369 (anterior nares) and a nasopharyngeal swab, using rayon tipped transport swabs containing  
370 Amies media with charcoal (Medical Wire and Equipment, Corsham, UK), were used for  
371 bacterial pathobiont isolation. A further nasal swab, taken from the un-swabbed nostril, and  
372 an oral (whole mouth) swab, supplied by uBiome Inc. (San Francisco, USA), were taken for  
373 microbiome analysis.

374

375 Bacteriology: Isolation of the common respiratory pathobionts *S. pneumoniae*, *H. influenzae*,  
376 *M. catarrhalis*, *N. meningitidis*, *S. aureus*, *K. pneumoniae* and *P. aeruginosa* was done by  
377 culture. Swabs were plated onto CBA (Columbia blood agar with horse blood), CHOC  
378 (Columbia blood agar with chocolated horse blood), CNA (Columbia Blood Agar with  
379 Colisitin and Naladixic Acid), BACH (Columbia Agar with Chocolated Horse Blood and

380 Bacitracin), GC (Lysed GC Selective Agar) and, for *P. aeruginosa*, CFC (*Pseudomonas* CFC  
381 Selective agar) (all Oxoid, UK). Primary identification of all bacterial species was by colonial  
382 morphology. Swabs were then vortexed in skim milk, tryptone, glucose and glycerine  
383 (STGG), and 10 $\mu$ L of the suspension was then  
384  
385 Serotyping of *S. pneumoniae*: Pneumococcal isolates were serotyped by slide agglutination  
386 reactions using a Neufeld *S. pneumoniae* antisera kit following manufacturer's guidelines  
387 (Statens Serum Institute, Copenhagen, Denmark).  
388  
389 Antimicrobial Resistance Testing: All bacteria were phenotypically tested for antibiotic  
390 resistance using antibiotic discs and/or minimum inhibitory concentration (MIC) strips, in  
391 accordance with EUCAST. Firstly, 10 $\mu$ L (a suspension of cells in liquid STGG) of each  
392 isolate was plated onto CBA (Oxoid, UK) or CHOC agar (Oxoid, UK). *M. catarrhalis*, *S.*  
393 *pneumoniae*, *S. aureus* and *K. pneumoniae* isolates were plated on CBA, whilst *H. influenzae*  
394 and *N. meningitidis* isolates were plated onto CHOC agar. Plates were incubated for 24 hours  
395 at 37°C in 5% CO<sub>2</sub>. Pure colonies were added to 1ml of saline to get an inoculum of 0.5  
396 McFarland. For *M. catarrhalis*, *S. pneumoniae*, *H. influenzae* and *N. meningitidis*, a sterile  
397 swab was used to spread this inoculum over Mueller-Hinton agar + 5% defibrinated horse  
398 blood and 20 mg<sup>-1</sup>  $\beta$ -NAD plates (MHF, Oxoid, UK). For *S. aureus* and *K. pneumoniae* a  
399 sterile swab was used to spread the inoculum over Mueller-Hinton agar plates (MH, Oxoid,  
400 UK). Antibiotic discs (Oxoid, UK) (four per plate) or MIC strips (E-tests; Oxoid, UK) (one  
401 per plate) were added and plates were incubated at 37°C in 5% CO<sub>2</sub> for 18 hours ( $\pm$ 2 hours).  
402 *M. catarrhalis* were tested with amoxicillin-clavulanic acid (2-1 $\mu$ g), cefotaxime (5 $\mu$ g),  
403 ceftriaxone (30 $\mu$ g), erythromycin (15 $\mu$ g), tetracycline (30 $\mu$ g), chloramphenicol (30 $\mu$ g),  
404 ciprofloxacin (5 $\mu$ g) and meropenem (10 $\mu$ g) antibiotic discs. *S. pneumoniae* were tested with

405 oxacillin (1µg), erythromycin (15µg), tetracycline (30µg) and chloramphenicol (30µg)  
406 antibiotic discs. *H. influenzae* were tested with benzylpenicillin (1µg), tetracycline (30µg),  
407 chloramphenicol (30µg) and ciprofloxacin (5µg) antibiotic discs as well as erythromycin  
408 (15µg) MIC strips. *S. aureus* were tested with benzylpenicillin (1µg), erythromycin (15µg),  
409 cefoxitin (30µg), tetracycline (30µg), chloramphenicol (30µg) and ciprofloxacin (5µg)  
410 antibiotic discs. *K. pneumoniae* were tested with amoxicillin - clavulanic acid (20-10µg),  
411 cefotaxime (5µg), ciprofloxacin (5µg), meropenem (10µg) and ceftazidime (10µg) antibiotic  
412 discs. *N. meningitidis* were tested with amoxicillin, benzylpenicillin (1µg), cefotaxime (5µg),  
413 ceftriaxone (30µg), chloramphenicol (30µg), ciprofloxacin (5µg) and meropenem (10µg)  
414 MIC strips.

415

416 16S rRNA Sequencing: The V4 region was amplified using primers 515F (5'-  
417 GTGCCAGCMGCCGCGGTAA-3') and 806R (5'-GGACTACHVGGGTWTCTAAT-3') to  
418 generate an amplicon of 460 bp [52] at uBiome Inc. (San Francisco, USA). Samples were  
419 individually barcoded and sequenced on a NextSeq 500 (Illumina, San Diego, USA) to  
420 generate 2 × 150 bp paired-end reads.

421

422 Microbiome Analysis: Initial data handling was done using QIIME 2 2018.8 [53]. Only  
423 forward reads were processed owing to low quality scores of reverse reads. Raw sequence  
424 data were denoised with DADA2 [54]. Amplicon sequence variants (ASVs) were aligned  
425 with mafft [55] (via q2 alignment) and a phylogeny constructed using fasttree2 [56].

426 Taxonomic classification was done using the q2 feature classifier [57] classify sklearn  
427 naïve Bayes taxonomy classifier using the Greengenes 13\_8 (99%) reference sequences [58].

428 The feature table, taxonomy, phylogenetic tree and sample metadata were then combined into  
429 a Phyloseq object using qiime2R [59] via qza\_to\_phyloseq. All further analysis was done in

430 R v3.6.0 [60] in RStudio and figures were produced using the package ggplot2 [61]. Phyloseq  
431 v1.29.0 [62] was used following a workflow previously described [63]. Potential  
432 contaminants were identified by prevalence in the blank swab controls and removed using the  
433 R package ‘decontam’ [64]. Samples with <1000 ASVs were excluded and taxa present in  
434 less than 5% of samples were removed using the prune\_taxa() phyloseq function. Alpha  
435 diversity was calculated using the estimate\_richness(). The R function stat\_compare\_means()  
436 was used to compare age groups using the nonparametric Wilcoxon test. Beta diversity was  
437 determined using Double Principle Co-ordinates Analysis and plot\_ordination(). Hierarchical  
438 clustering was done using Bray-Curtis Dissimilarity calculated using vegdist() from the R  
439 package vegan [65]. Differentially abundant ASVs were identified using the DESeq2 [66]  
440 package using an adjusted p-value cut-off of 0.05 and a Log<sub>2</sub> fold change of 1.5.

441 **Abbreviations:**

442 AMR – antimicrobial resistance; ASV – amplicon sequencing variant; PCV – pneumococcal  
443 conjugate vaccine; VT – vaccine type pneumococci; NVT- non-vaccine type pneumococci;  
444 ESKAPE - *Enterococcus faecium*, *Staphylococcus aureus*, *Klebsiella pneumoniae*,  
445 *Acinetobacter baumannii*, *Pseudomonas aeruginosa*, and *Enterobacter* spp.

446

447 **Ethics Approval and Consent to Participate:**

448 Ethical approval for this study was provided by Universiti Sultan Zainal Abidin (UniSZA)  
449 Ethics Committee: approval no. UniSZA/C/1/UHREC/628-1(85) dated 27th June 2016, the  
450 Department of Orang Asli Affairs and Development (JAKOA): approval no.  
451 JAKOA/PP.30.052Jld11 (42), and by the University of Southampton Faculty of Medicine  
452 Ethics Committee (Submission ID: 20831). Informed consent was taken for all participants,  
453 with parents/guardians providing consent for those <17 years old. Participation in the study  
454 involved reading (or being read) and understanding the translated participant information  
455 sheet, and the completion of a consent form and questionnaire. This process was facilitated  
456 by native speakers.

457

458 **Consent for Publication:**

459 Not applicable.

460

461 **Availability of Data and Materials:**

462 Sequence files and associated metadata have been deposited in the European Nucleotide  
463 Archive (ENA) in project PRJEB38610 under experiment accessions ERX4147052 to  
464 ERX4147288.

465

466 **Competing Interests:**

467 SCC acts as principal investigator on studies conducted on behalf of University Hospital  
468 Southampton NHS Foundation Trust/University of Southampton that are sponsored by  
469 vaccine manufacturers but receives no personal payments from them. SCC has participated in  
470 advisory boards for vaccine manufacturers but receives no personal payments for this work.  
471 SCC has received financial assistance from vaccine manufacturers to attend conferences.  
472 DWC was a post-doctoral researcher on projects funded by Pfizer and GSK between April  
473 2014 and October 2017. All grants and honoraria are paid into accounts within the respective  
474 NHS Trusts or Universities, or to independent charities. All other authors have no conflicts of  
475 interest.

476

477 **Funding:**

478 The laboratory microbiology work was funded by a grant from the Higher Education Funding  
479 Council for England (HEFCE) Newton Fund Official Development Assistance (ODA) fund.  
480 The microbiome sequencing was funded through a uBiome Inc. Microbiome Grants Initiative  
481 award.

482

483 **Authors Contributions:**

484 DWC and SCC conceived the project with YCC. DE, RAA and HM were the UoS contingent  
485 who undertook the sampling and helped with study planning and design. AGA, NIAR, SI,  
486 MSR, RMA, AAA, NKE, SA, CHC MHAS and RA helped with study design, coordinated  
487 sampling visits to Orang Asli settlements, liaised with those communities and assisted with  
488 sampling and questionnaires. AGA did the microbiological culture and antibiotic testing with  
489 RAA and DE. DWC carried out the data analysis and wrote the paper. All authors provided  
490 critical feedback and helped shape the manuscript.

491

492 **Acknowledgments:**

493 We would like to thank the Department of Orang Asli Affairs and Development (JAKOA),  
494 Additionally, the authors would especially like to thank the communities of Kampung Sungai  
495 Pergam and Kampung Berua for their support and participation in this study.

496

497 **Figure Legends:**

498 **Figure 1: Location of Orang asli sites with age and gender demographics.** The location of  
499 Orang Asli settlements were in the north-east of Peninsula Malaysia (A) to the south of the  
500 Terengganu state's capital city, Kuala Terengganu (B). An even gender split was achieved  
501 (C) but with disproportionate recruitment in older children >5 years of age and adults less  
502 than <65 (D).

503

504 **Figure 2: Carriage Prevalence of *S. pneumoniae*, *H. influenzae*, *S. aureus* and *M.***  
505 ***catarrhalis*.** Point estimates for percentage carriage prevalence of four key upper respiratory  
506 tract pathobionts are shown across three age groups <5, 5 to 17 and 18 to 65. Those aged 65+  
507 are not shown due to limited numbers. All 'Unknowns' were of adult age. Carriage was  
508 estimated overall i.e. a positive swab culture from either nasal or nasopharyngeal swab (dark  
509 blue), and also separately for each swab type (nasal – black; NP – grey). Error bars show  
510 95% CI intervals.

511

512 **Figure 3: Prevalence of PCV7, PCV13 and non-vaccine pneumococcal serotypes.** Bar  
513 plot with 95% CI showing prevalence of serotypes that are included in PCV7 (black),  
514 additional types covered by PCV13 (grey) or non-vaccine serotypes (white).

515



516 **Figure 4: Antibiotic resistance of *S. pneumoniae* (Spn), *S. aureus* (Sa) and *H. influenzae***  
517 **(Hi).** Columns represent the proportion of isolates that were resistant to tetracycline,  
518 chloramphenicol, erythromycin, ciprofloxacin and penicillin.

519

520 **Figure 5: Alpha and Beta Diversity of Nasal (left column) and Oral (right column)**  
521 **Samples.** Observed richness and Simpsons 1-D (a measure of diversity) are shown in rows A  
522 and B respectively. Only a significant difference (\*\*) was observed for nasal samples for  
523 those aged 5-17 when compared against 50-65 ( $p = 0.0023$ ). Beta diversity is shown using  
524 Double Principle Coordinates Analysis (DPCoA) (row C). Here, clusters are observed for  
525 nasal samples (left) with grouping based on age-group. No clusters were observed for oral  
526 samples (right).

527

528 **Figure 6: Log Transformed Abundances of Phylum-level ASV Classifications in Nasal**  
529 **(top) and Oral (bottom) Samples.** Bars are coloured by site of location. Firmicutes,  
530 Actinobacteria and Proteobacteria were the most abundant phyla in Nasal samples with  
531 Bacteroidetes, Firmicutes and Proteobacteria the most common in Oral samples. A clear  
532 increase in Firmicutes in nasal samples from Site 2 (Kampung Berua) can be seen.

533

534 **Figure 7: Hierarchical Clustering of Nasal Samples with Bray-Curtis Dissimilarity**  
535 **using Genus-level Relative Abundances.** The dendrogram (top) shows clustering of  
536 samples with the below bar chart showing the relative abundance of the eight most  
537 commonly observed Genera. Six clear clusters were observed including a *Corynebacterium*  
538 dominant profile (n=28; 35.4%), a *Corynebacterium/Dolosigranulum* profile (n=16; 20.3%),  
539 a *Moraxella* profile (n=10; 12.7%) a *Moraxella/Haemophilus* profile (n=10; 12.7%), a  
540 *Delftia/Orchobactum* profile (n=4; 5.1%) and a final group of two samples characterised by

541 high *Streptococcus*, in one case with *Haemophilus*. Culture results for *S. aureus* (dark blue)  
542 and *S. pneumoniae* (pink) are shown as coloured circles at the tips of the dendrogram. There  
543 is no clear distribution of individuals who were culture positive for either bacterium.

544

545 **Figure 8: Differentially Abundant ASVs Between Older Children (5-17 years) and**  
546 **Adults (18-49).** Volcano plot showing the ASVs that were differentially abundant in  
547 comparisons between the two age groups. Here a p-value cut-off of 0.05 and a Log<sub>2</sub> fold  
548 change of 1.5 was applied. Those ASVs that pass both these thresholds are labelled where a  
549 genus and/or species taxonomic assignment was available.

550

551 **Figure 9: Hierarchical Clustering of Oral Samples with Bray-Curtis Dissimilarity using**  
552 **Genus-level Relative Abundances.** The dendrogram (top) shows clustering of samples with  
553 the below bar chart showing the relative abundance of the six most commonly observed  
554 Genera. Three genera are seen to be responsible for the majority of ASVs – *Streptococcus*  
555 (brown), *Haemophilus* (orange) and *Neisseria* (purple). Profiles characterised by an  
556 overabundance of *Streptococcus* or *Neisseria* are seen, as too are those containing both  
557 *Streptococcus* and *Haemophilus*.

558

559 **Supplementary Figure 1: Comparison of the relative abundance of Streptococcal and**  
560 **Staphylococcus ASVs between those that were culture positive or negative for**  
561 ***Streptococcus pneumoniae* or *Staphylococcus aureus*. P values were calculated using the**  
562 **nonparametric Wilcoxon test.**

563 **References:**

- 564 1. Rogers, G.B., et al., *Inclusivity and equity in human microbiome research*. The  
565 Lancet, 2019. **393**(10173): p. 728-729.
- 566 2. Schnorr, S.L., et al., *Gut microbiome of the Hadza hunter-gatherers*. Nature  
567 Communications, 2014. **5**(1): p. 3654.
- 568 3. Clemente, J.C., et al., *The microbiome of uncontacted Amerindians*. Science  
569 Advances, 2015. **1**.
- 570 4. Obregon-Tito, A.J., et al., *Subsistence strategies in traditional societies distinguish  
571 gut microbiomes*. Nature Communications, 2015. **6**(1): p. 6505.
- 572 5. Filippo, C., et al., *Impact of diet in shaping gut microbiota revealed by a comparative  
573 study in children from Europe and rural Africa*. Proc Natl Acad Sci U S A, 2010. **107**.
- 574 6. Yatsunenkov, T., et al., *Human gut microbiome viewed across age and geography*.  
575 Nature, 2012. **486**.
- 576 7. Sankaranarayanan, K., et al., *Gut Microbiome Diversity among Cheyenne and  
577 Arapaho Individuals from Western Oklahoma*. Current Biology, 2015. **25**(24): p.  
578 3161-3169.
- 579 8. Nasidze, I., et al., *High Diversity of the Saliva Microbiome in Batwa Pygmies*. PLOS  
580 ONE, 2011. **6**(8): p. e23352.
- 581 9. Lozano, R., et al., *Global and regional mortality from 235 causes of death for 20 age  
582 groups in 1990 and 2010: a systematic analysis for the Global Burden of Disease  
583 Study 2010*. The Lancet, 2012. **380**(9859): p. 2095-2128.
- 584 10. Man, W.H., W.A.A. de Steenhuijsen Piters, and D. Bogaert, *The microbiota of the  
585 respiratory tract: gatekeeper to respiratory health*. Nat Rev Micro, 2017. **15**(5): p.  
586 259-270.
- 587 11. SyedHussain, T., Krishnasamy, DS., Hassan, AAG., *Distribution and demography of  
588 the Orang Asli in Malaysia*. International Journal of Humanities and Social Science  
589 Invention, 2017. **6**(1): p. 40-45.
- 590 12. Masron T., M.F., Ismail N., *Orang Asli in Peninsular Malaysia: Population, Spatial  
591 Distribution and Socio-Economic Condition*. J Ritsumeikan Soc Sci Humanit, 2013.  
592 **6**: p. 75-115.
- 593 13. Mohd Asri, M.N., *Advancing the Orang Asli through Malaysia Clusters of Excellence  
594 Policy*. Journal of International and Comparative Education, 2012. **1**(2).
- 595 14. Al-Mekhlafi, H.M., et al., *Prevalence and risk factors of Strongyloides stercoralis  
596 infection among Orang Asli schoolchildren: new insights into the epidemiology,  
597 transmission and diagnosis of strongyloidiasis in Malaysia*. Parasitology, 2019.  
598 **146**(12): p. 1602-1614.
- 599 15. Al-Mekhlafi, H.M., et al., *Protein-energy malnutrition and soil-transmitted  
600 helminthiasis among Orang Asli children in Selangor, Malaysia*. Asia Pac J Clin  
601 Nutr, 2005. **14**(2): p. 188-94.
- 602 16. Yeo, L.-F., et al., *Health and saliva microbiomes of a semi-urbanized indigenous  
603 tribe in Peninsular Malaysia*. F1000Research, 2019. **8**: p. 175-175.
- 604 17. Bogaert, D., R. de Groot, and P.W.M. Hermans, *Streptococcus pneumoniae  
605 colonisation: the key to pneumococcal disease*. The Lancet Infectious Diseases, 2004.  
606 **4**(3): p. 144-154.
- 607 18. Wertheim, H.F.L., et al., *The role of nasal carriage in Staphylococcus aureus  
608 infections*. The Lancet Infectious Diseases, 2005. **5**(12): p. 751-762.
- 609 19. Slack, M.P.E., *A review of the role of Haemophilus influenzae in community-acquired  
610 pneumonia*. Pneumonia, 2015. **6**.

- 611 20. Zaneveld, J.R., R. McMinds, and R. Vega Thurber, *Stress and stability: applying the*  
612 *Anna Karenina principle to animal microbiomes*. *Nature Microbiology*, 2017. **2**(9): p.  
613 17121.
- 614 21. *Statistics on Causes of Death, Malaysia*, D.o.S. Malaysia, Editor. 2018.
- 615 22. Hill, P.C., et al., *Nasopharyngeal Carriage of Streptococcus pneumoniae in Gambian*  
616 *Infants: A Longitudinal Study*. *Clinical Infectious Diseases*, 2008. **46**(6): p. 807-814.
- 617 23. Regev-Yochay, G., et al., *Nasopharyngeal Carriage of Streptococcus pneumoniae by*  
618 *Adults and Children in Community and Family Settings*. *Clinical Infectious Diseases*,  
619 2004. **38**(5): p. 632-639.
- 620 24. Bogaert, D., et al., *Colonisation by Streptococcus pneumoniae and Staphylococcus*  
621 *aureus in healthy children*. *Lancet*, 2004. **363**.
- 622 25. Southern, J., et al., *Pneumococcal carriage in children and their household contacts*  
623 *six years after introduction of the 13-valent pneumococcal conjugate vaccine in*  
624 *England*. *PLOS ONE*, 2018. **13**(5): p. e0195799.
- 625 26. Mackenzie, G.A., et al., *Epidemiology of nasopharyngeal carriage of respiratory*  
626 *bacterial pathogens in children and adults: cross-sectional surveys in a population*  
627 *with high rates of pneumococcal disease*. *BMC Infectious Diseases*, 2010. **10**(1): p.  
628 304.
- 629 27. Watt, J.P., et al., *Nasopharyngeal versus Oropharyngeal Sampling for Detection of*  
630 *Pneumococcal Carriage in Adults*. *Journal of Clinical Microbiology*, 2004. **42**: p.  
631 4974-4976.
- 632 28. Jauneikaite, E., et al., *Prevalence of Streptococcus pneumoniae serotypes causing*  
633 *invasive and non-invasive disease in South East Asia: A review*. *Vaccine*, 2012.  
634 **30**(24): p. 3503-3514.
- 635 29. Arushothy, R., et al., *Pneumococcal serotype distribution and antibiotic susceptibility*  
636 *in Malaysia: A four-year study (2014–2017) on invasive paediatric isolates*.  
637 *International Journal of Infectious Diseases*, 2019. **80**: p. 129-133.
- 638 30. Coughtrie, A.L., et al., *Ecology and diversity in upper respiratory tract microbial*  
639 *population structures from a cross-sectional community swabbing study*. *Journal of*  
640 *Medical Microbiology*, 2018. **67**(8): p. 1096-1108.
- 641 31. Abdullahi, O., et al., *The descriptive epidemiology of Streptococcus pneumoniae and*  
642 *Haemophilus influenzae nasopharyngeal carriage in children and adults in Kilifi*  
643 *district, Kenya*. *The Pediatric infectious disease journal*, 2008. **27**(1): p. 59-64.
- 644 32. Mahadevan, M., et al., *A review of the burden of disease due to otitis media in the*  
645 *Asia-Pacific*. *International Journal of Pediatric Otorhinolaryngology*, 2012. **76**(5): p.  
646 623-635.
- 647 33. Kovács, E., et al., *Co-carriage of Staphylococcus aureus, Streptococcus pneumoniae,*  
648 *Haemophilus influenzae and Moraxella catarrhalis among three different age*  
649 *categories of children in Hungary*. *PLOS ONE*, 2020. **15**(2): p. e0229021.
- 650 34. Verhagen, L.M., et al., *Nasopharyngeal carriage of respiratory pathogens in Warao*  
651 *Amerindians: significant relationship with stunting*. *Tropical Medicine &*  
652 *International Health*, 2017. **22**(4): p. 407-414.
- 653 35. Sollid, J.U.E., et al., *Staphylococcus aureus: Determinants of human carriage*.  
654 *Infection, Genetics and Evolution*, 2014. **21**: p. 531-541.
- 655 36. Choi, C.S., et al., *Nasal carriage of Staphylococcus aureus among healthy adults*. *J*  
656 *Microbiol Immunol Infect*, 2006. **39**(6): p. 458-64.
- 657 37. Ruimy, R., et al., *Are host genetics the predominant determinant of persistent nasal*  
658 *Staphylococcus aureus carriage in humans?* *The Journal of Infectious Diseases*,  
659 2010. **202**(6): p. 924-934.

- 660 38. Tong, S.Y.C., et al., *Progressive increase in community-associated methicillin-*  
661 *resistant Staphylococcus aureus in Indigenous populations in northern Australia from*  
662 *1993 to 2012.* *Epidemiology and Infection*, 2015. **143**(7): p. 1519-1523.
- 663 39. Liu, C.M., et al., *Staphylococcus aureus and the ecology of the nasal microbiome.*  
664 *Science Advances*, 2015. **1**(5).
- 665 40. Cremers, A.J., et al., *The adult nasopharyngeal microbiome as a determinant of*  
666 *pneumococcal acquisition.* *Microbiome*, 2014. **2**(1): p. 1-10.
- 667 41. Yan, M., et al., *Nasal microenvironments and interspecific interactions influence*  
668 *nasal microbiota complexity and S. aureus carriage.* *Cell host & microbe*, 2013.  
669 **14**(6): p. 631-640.
- 670 42. Bomar, L., et al., *Corynebacterium accolens Releases Antipneumococcal Free Fatty*  
671 *Acids from Human Nostril and Skin Surface Triacylglycerols.* *mBio*, 2016. **7**(1).
- 672 43. De Boeck, I., et al., *Comparing the Healthy Nose and Nasopharynx Microbiota*  
673 *Reveals Continuity As Well As Niche-Specificity.* *Frontiers in microbiology*, 2017. **8**:  
674 p. 2372-2372.
- 675 44. Biesbroek, G., et al., *Early respiratory microbiota composition determines bacterial*  
676 *succession patterns and respiratory health in children.* *Am J Respir Crit Care Med*,  
677 2014. **190**.
- 678 45. Laufer, A.S., et al., *Microbial Communities of the Upper Respiratory Tract and Otitis*  
679 *Media in Children.* *mBio*, 2011. **2**(1).
- 680 46. Teo Shu, M., et al., *The infant nasopharyngeal microbiome impacts severity of lower*  
681 *respiratory infection and risk of asthma development.* *Cell Host Microbe*, 2015. **17**.
- 682 47. Durack, J., H.A. Boushey, and S.V. Lynch, *Airway Microbiota and the Implications*  
683 *of Dysbiosis in Asthma.* *Current Allergy and Asthma Reports*, 2016. **16**(8): p. 52.
- 684 48. Ege, M.J., et al., *Exposure to environmental microorganisms and childhood asthma.*  
685 *New Engl J Med*, 2011. **364**.
- 686 49. Verma, D., P.K. Garg, and A.K. Dubey, *Insights into the human oral microbiome.*  
687 *Archives of Microbiology*, 2018. **200**(4): p. 525-540.
- 688 50. Salter, S.J., et al., *Reagent and laboratory contamination can critically impact*  
689 *sequence-based microbiome analyses.* *BMC Biol*, 2014. **12**.
- 690 51. Wang, J., et al., *Human oral microbiome characterization and its association with*  
691 *environmental microbiome revealed by the Earth Microbiome Project.* *bioRxiv*, 2019:  
692 p. 732123.
- 693 52. Almonacid, D.E., et al., *16S rRNA gene sequencing and healthy reference ranges for*  
694 *28 clinically relevant microbial taxa from the human gut microbiome.* *PLOS ONE*,  
695 2017. **12**(5): p. e0176555.
- 696 53. Bolyen, E., et al., *Reproducible, interactive, scalable and extensible microbiome data*  
697 *science using QIIME 2.* *Nature Biotechnology*, 2019. **37**(8): p. 852-857.
- 698 54. Callahan, B.J., et al., *DADA2: High-resolution sample inference from Illumina*  
699 *amplicon data.* *Nat Methods*, 2016. **13**.
- 700 55. Katoh, K., et al., *MAFFT: a novel method for rapid multiple sequence alignment*  
701 *based on fast Fourier transform.* *Nucleic acids research*, 2002. **30**(14): p. 3059-3066.
- 702 56. Price, M.N., P.S. Dehal, and A.P. Arkin, *FastTree 2--approximately maximum-*  
703 *likelihood trees for large alignments.* *PLoS One*, 2010. **5**.
- 704 57. Bokulich, N.A., et al., *Optimizing taxonomic classification of marker-gene amplicon*  
705 *sequences with QIIME 2's q2-feature-classifier plugin.* *Microbiome*, 2018. **6**(1): p.  
706 90.
- 707 58. McDonald, D., et al., *An improved Greengenes taxonomy with explicit ranks for*  
708 *ecological and evolutionary analyses of bacteria and archaea.* *The ISME journal*,  
709 2012. **6**(3): p. 610-618.



- 710 59. Bisanz, J.E. *qiime2R: Importing QIIME2 artifacts and associated data into R*  
711 *sessions*. 2018; Available from: <https://github.com/jbisanz/qiime2R>.  
712 60. Team, R.C., *R: a language and environment for statistical computing*. 2014, Vienna,  
713 Austria: R Foundation for Statistical Computing.  
714 61. Wickham, H., *ggplot2: Elegant Graphics for Data Analysis*. 2016: Springer-Verlag  
715 New York.  
716 62. McMurdie, P.J.H., S., *phyloseq: an R package for reproducible interactive analysis*  
717 *and graphics of microbiome census data*. . PLoS One, 2013. **8**(4).  
718 63. Callahan, B., et al., *Bioconductor Workflow for Microbiome Data Analysis: from raw*  
719 *reads to community analyses [version 2; peer review: 3 approved]*. F1000Research,  
720 2016. **5**(1492).  
721 64. Davis, N.M., et al., *Simple statistical identification and removal of contaminant*  
722 *sequences in marker-gene and metagenomics data*. Microbiome, 2018. **6**(1): p. 226.  
723 65. Oksanen, J., et al., *Vegan: Community ecology package*. *R Packag.* 2.3-3. 2016.  
724 66. Love, M.I., Huber, W., Anders, S., *Moderated estimation of fold change and*  
725 *dispersion for RNA-seq data with DESeq2*. . Genome Biology, 2014. **15**(12).  
726

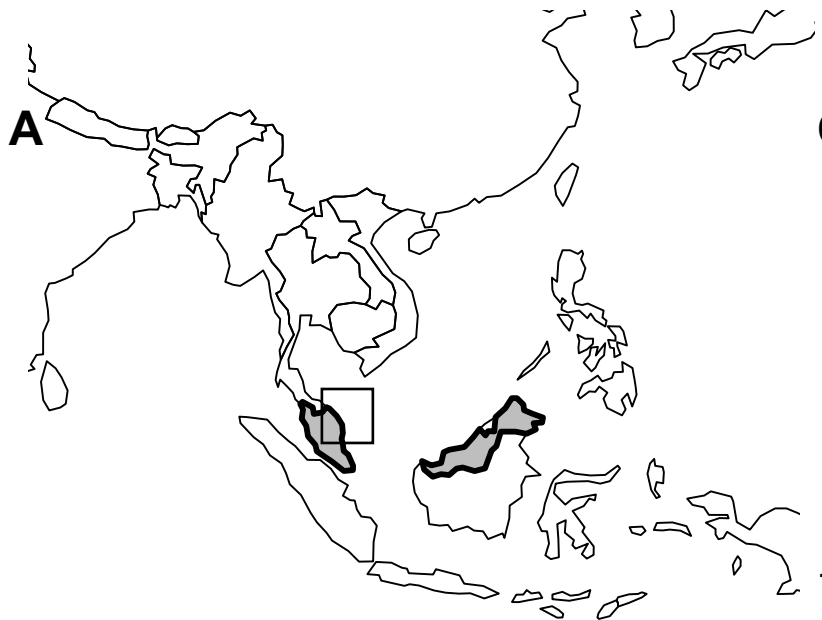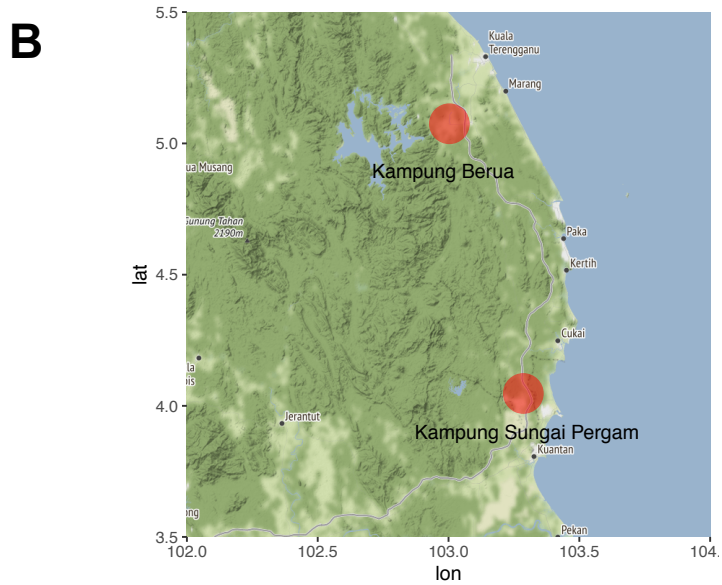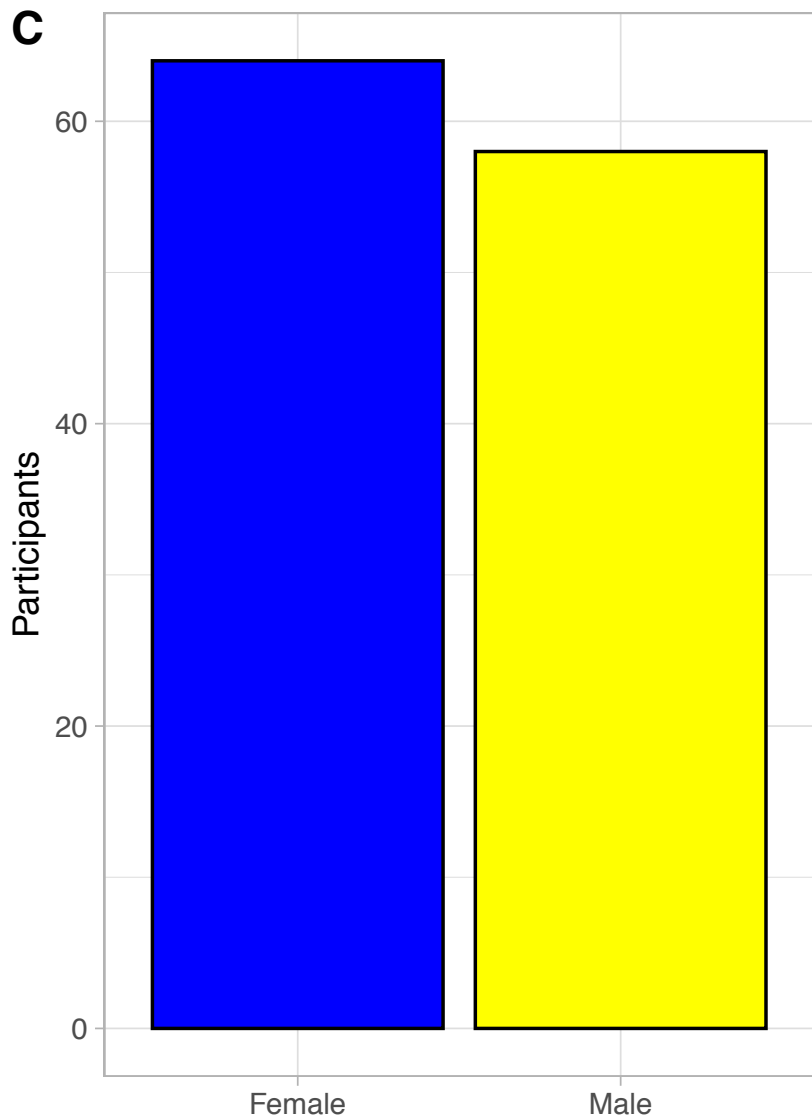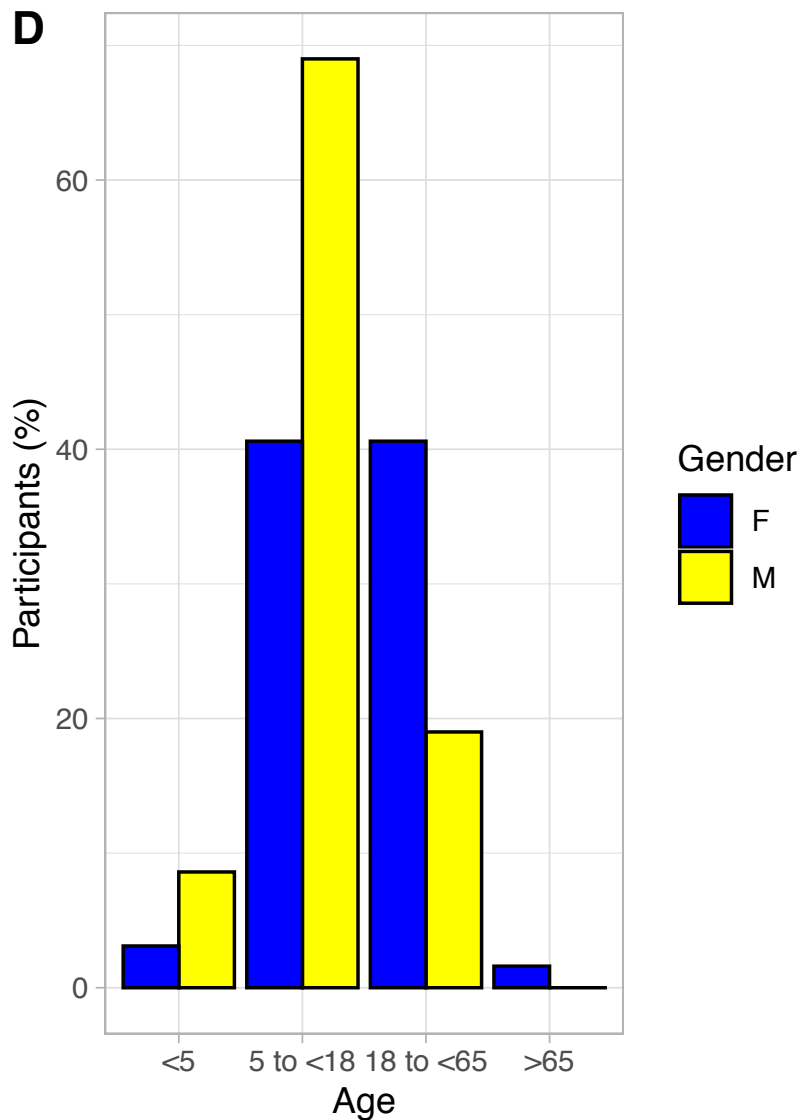

*S. pneumoniae*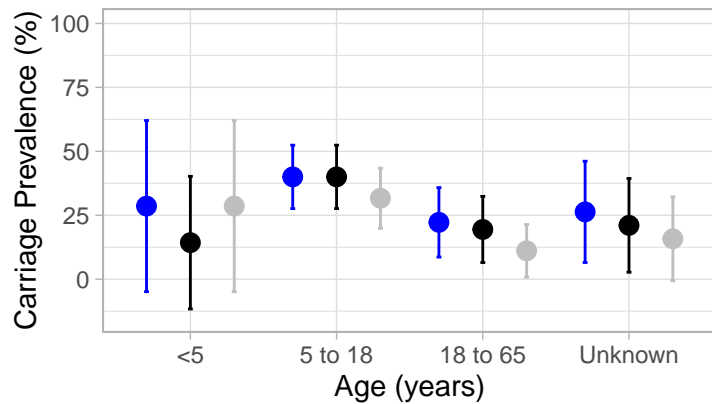*H. influenzae*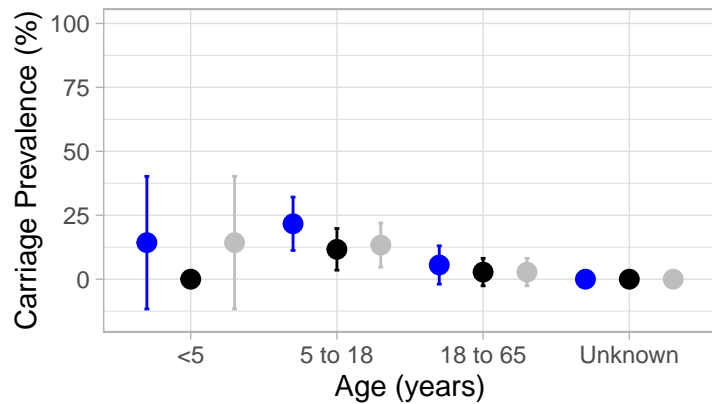*S. aureus*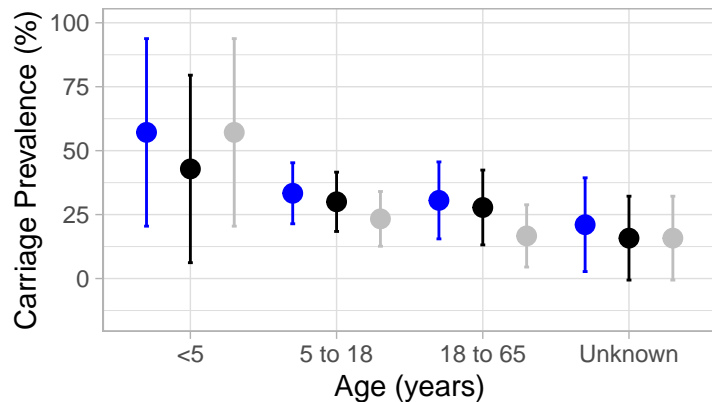*M. catarrhalis*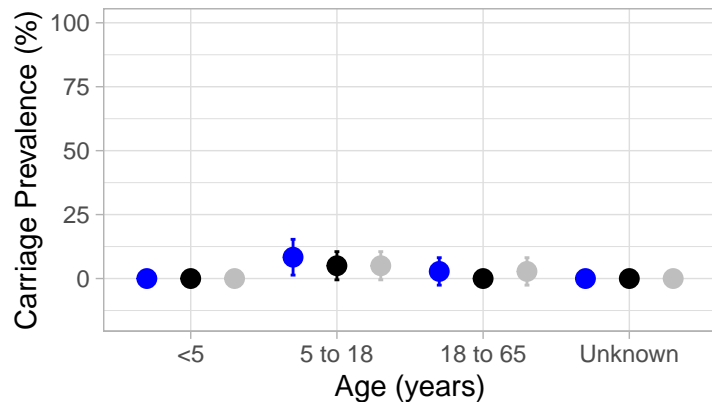

● Combined ● Nose ● NP



Table 1: Multi- versus single-species carriage of *Streptococcus pneumoniae* (Spn), *Staphylococcus aureus* (Sa), *Haemophilus influenzae* (Hi) and *Moraxella catarrhalis* (Mc). Forty-seven individuals were culture negative. Seven had single-species profiles involving *Klebsiella pneumoniae* (n=3),  $\alpha$ -haemolytic *Streptococci* (n=2) or *Pseudomonas aeruginosa* (n=2). A final thirteen had different multi-species profiles to those listed below.

| <b>Bacterial Species</b> | <b>N</b> | <b>%</b> |
|--------------------------|----------|----------|
| Sa                       | 25       | 19.23    |
| Spn                      | 16       | 12.31    |
| Spn-Hi                   | 7        | 5.38     |
| Spn-Sa                   | 5        | 3.85     |
| Hi                       | 2        | 1.54     |
| Mc                       | 1        | 0.77     |
| Spn-Mc                   | 1        | 0.77     |
| Hi-Sa                    | 1        | 0.77     |
| Hi-Mc                    | 1        | 0.77     |
| Spn-Hi-Sa                | 1        | 0.77     |
| Spn-Hi-Mc                | 1        | 0.77     |
| Sa-Mc                    | 0        | 0.00     |
| Hi-Sa-Mc                 | 0        | 0.00     |
| Sa-Mc-Spn                | 0        | 0.00     |
| Sa-Mc-Spn-Hi             | 0        | 0.00     |

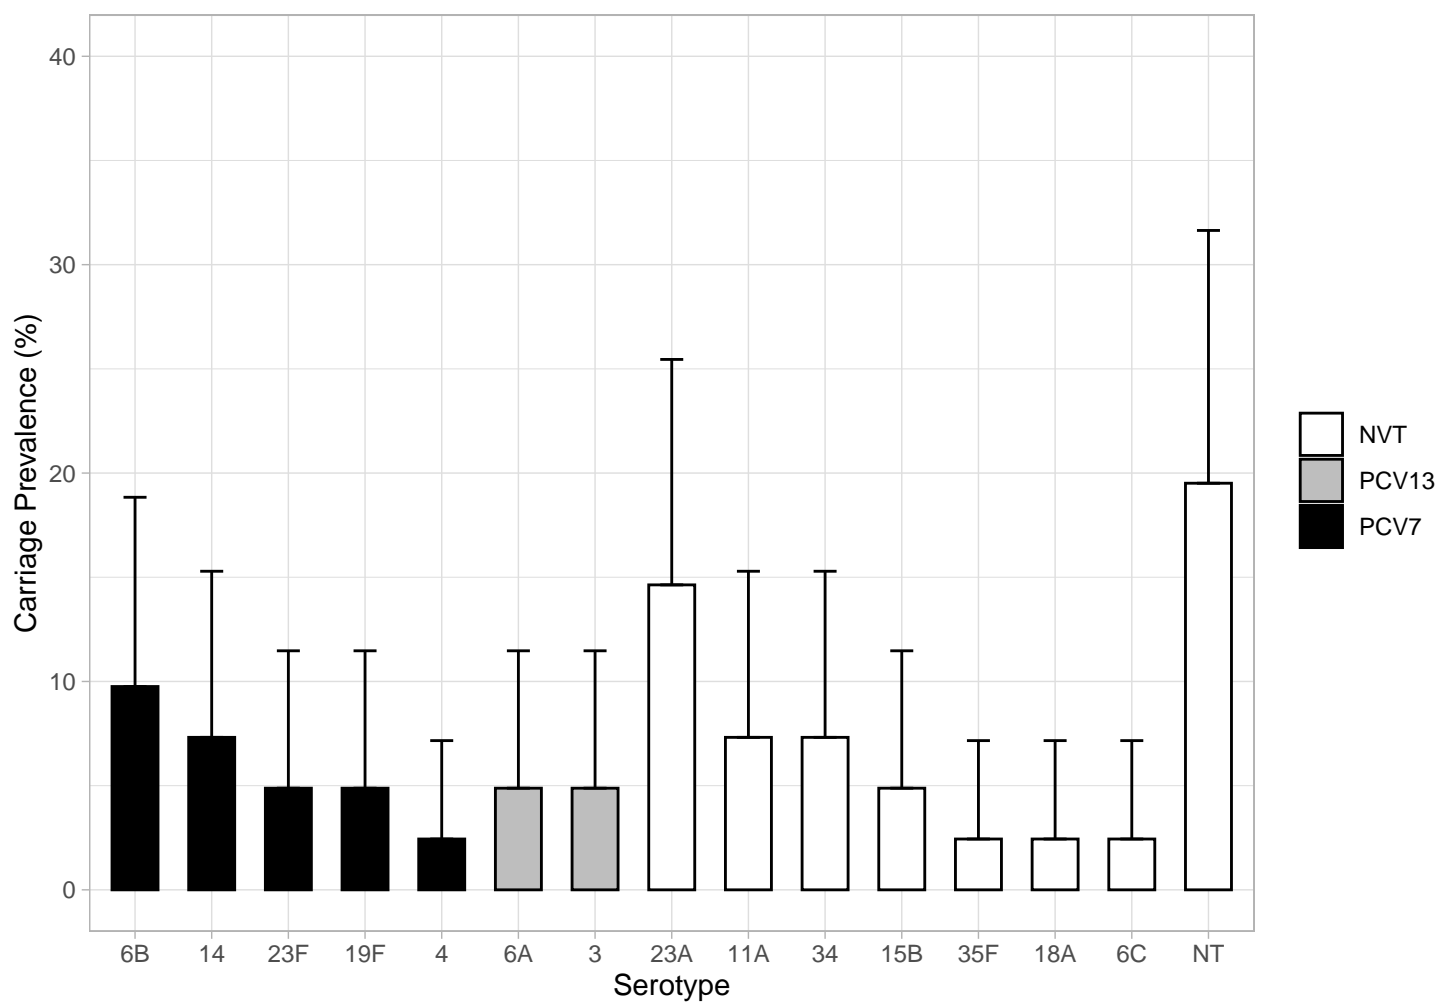

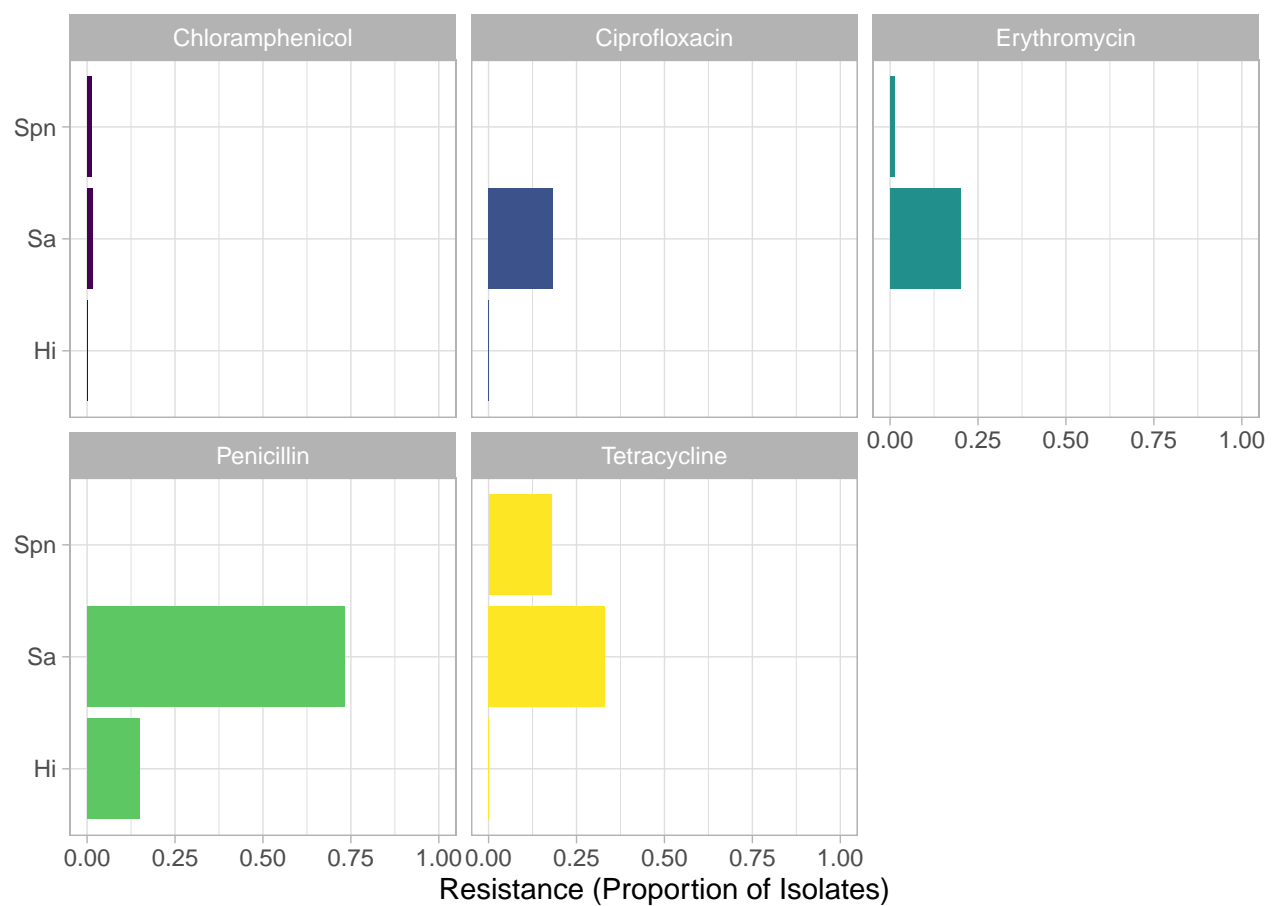

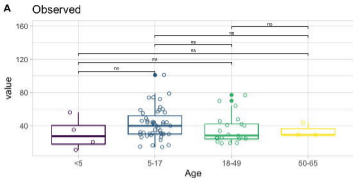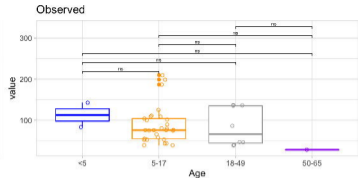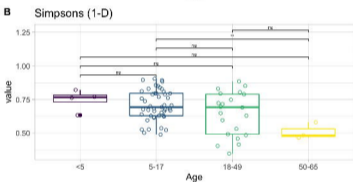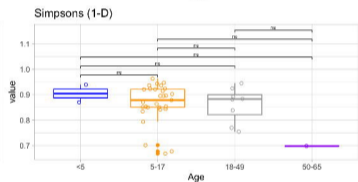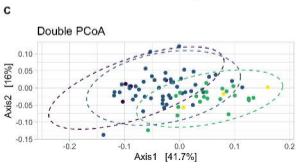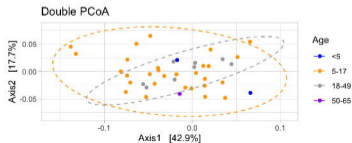

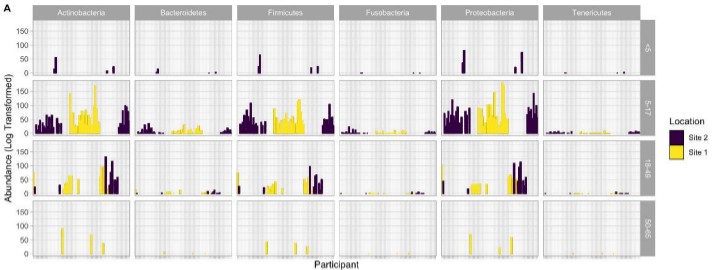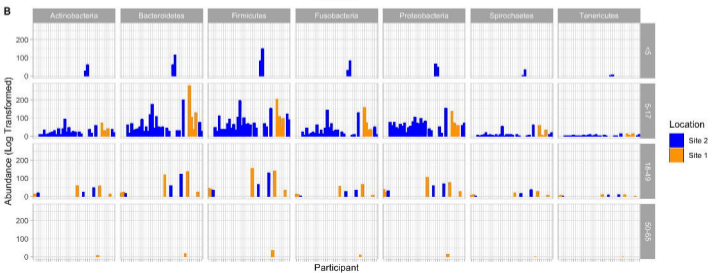

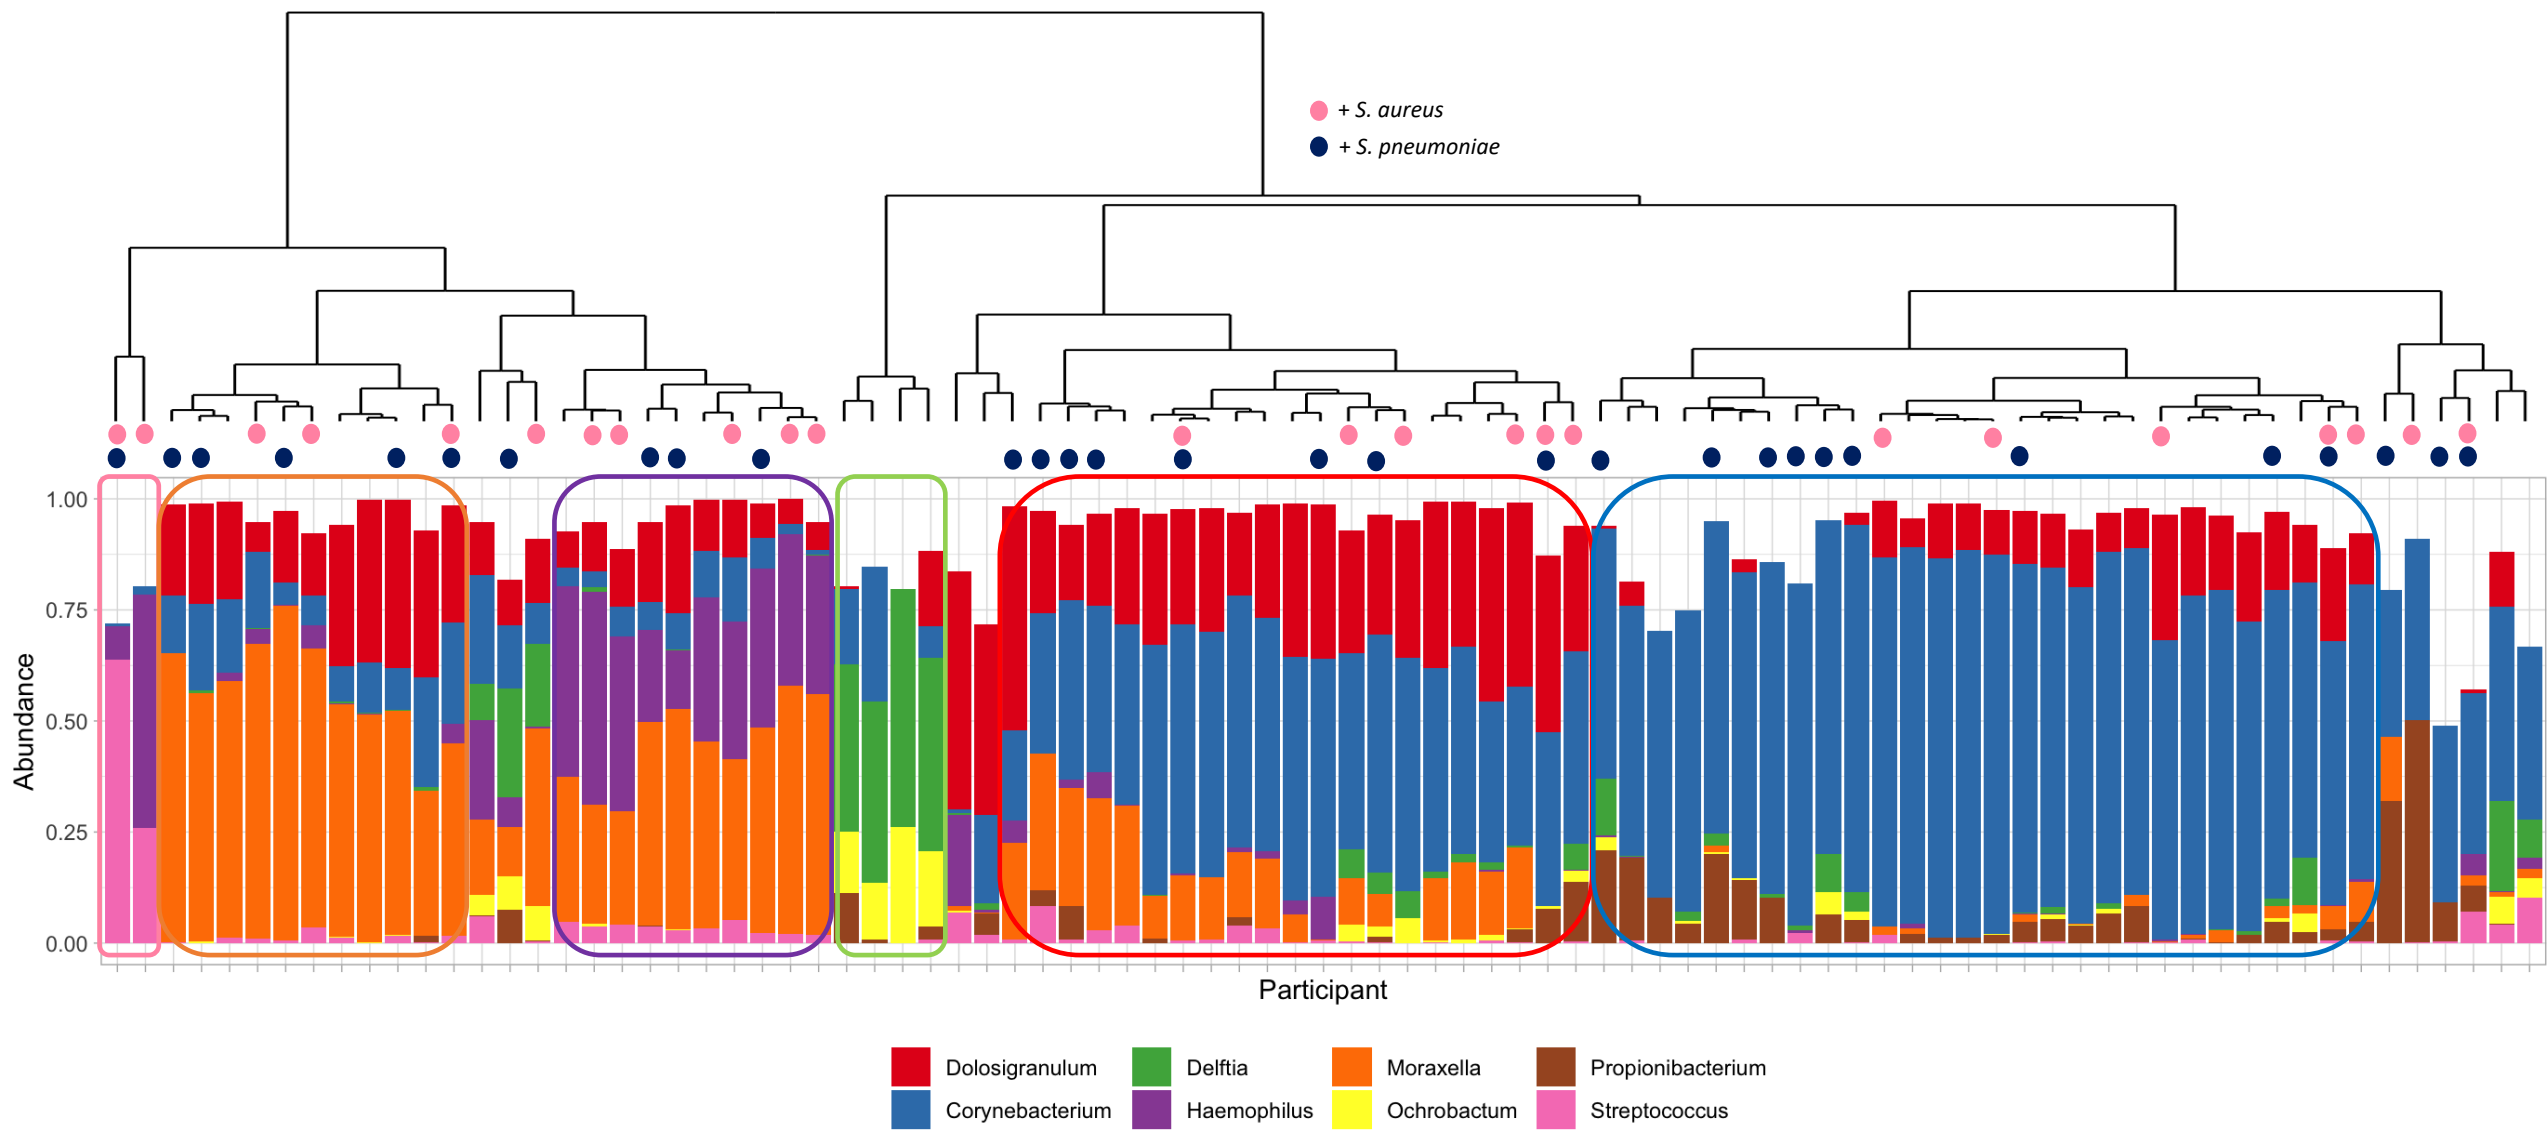

# Age Group Comparison 5-17 vs.18-49

EnhancedVolcano

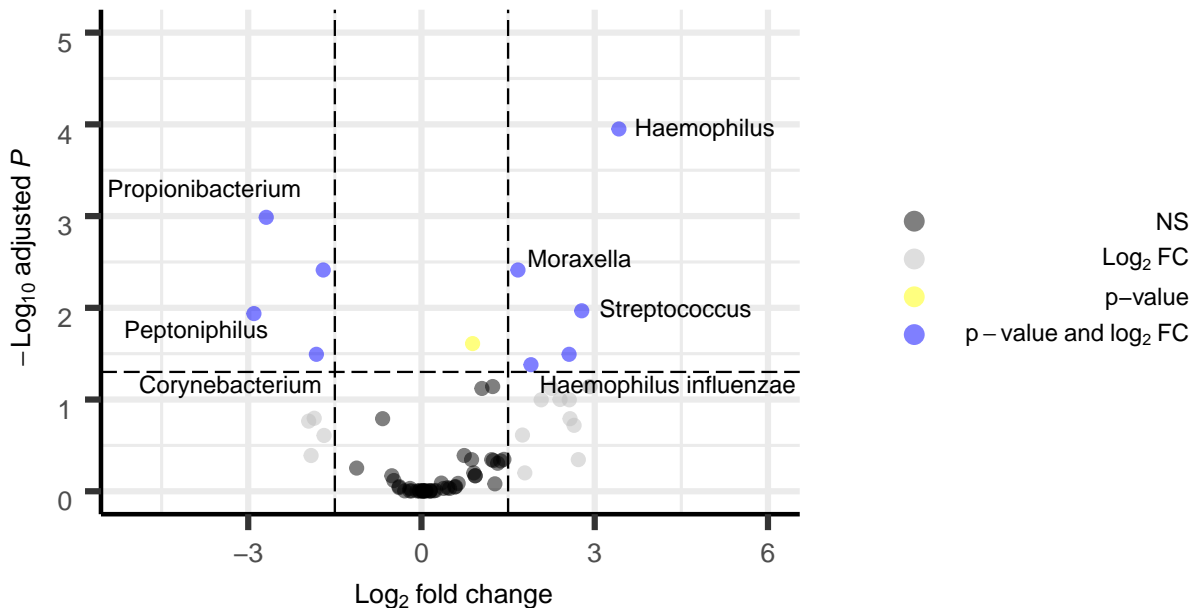

Total = 205 variables

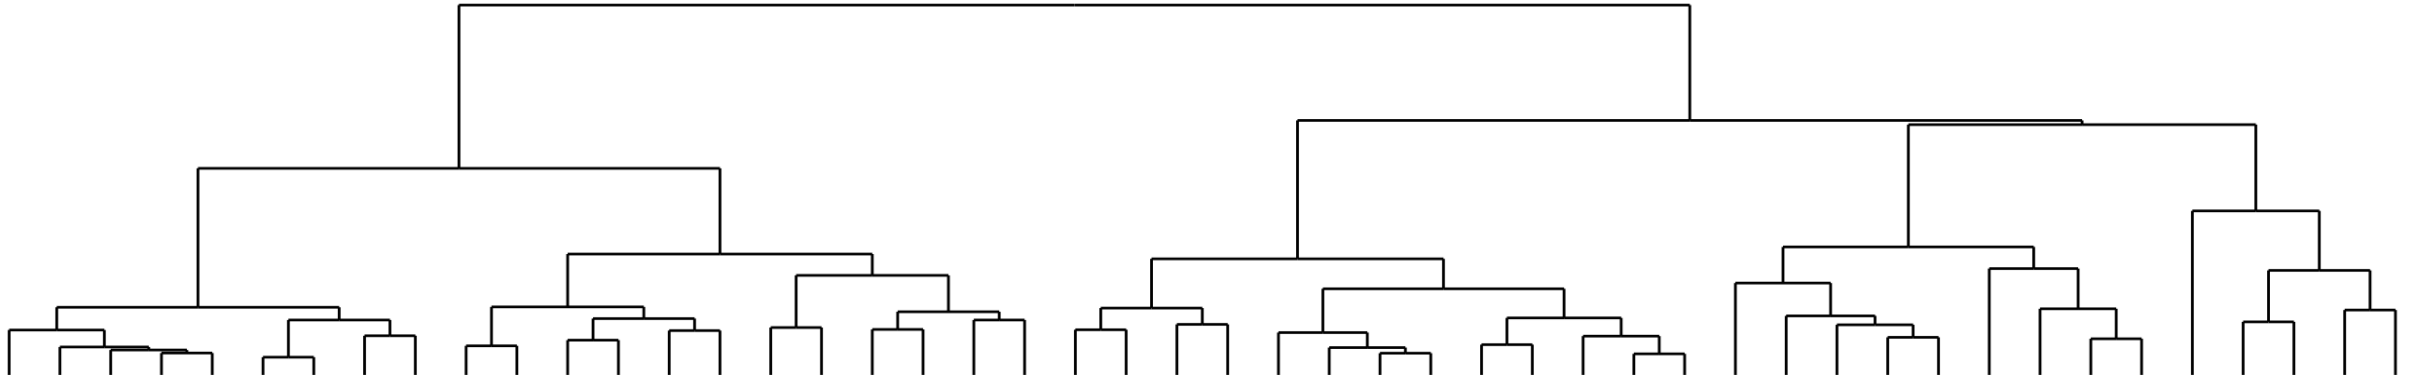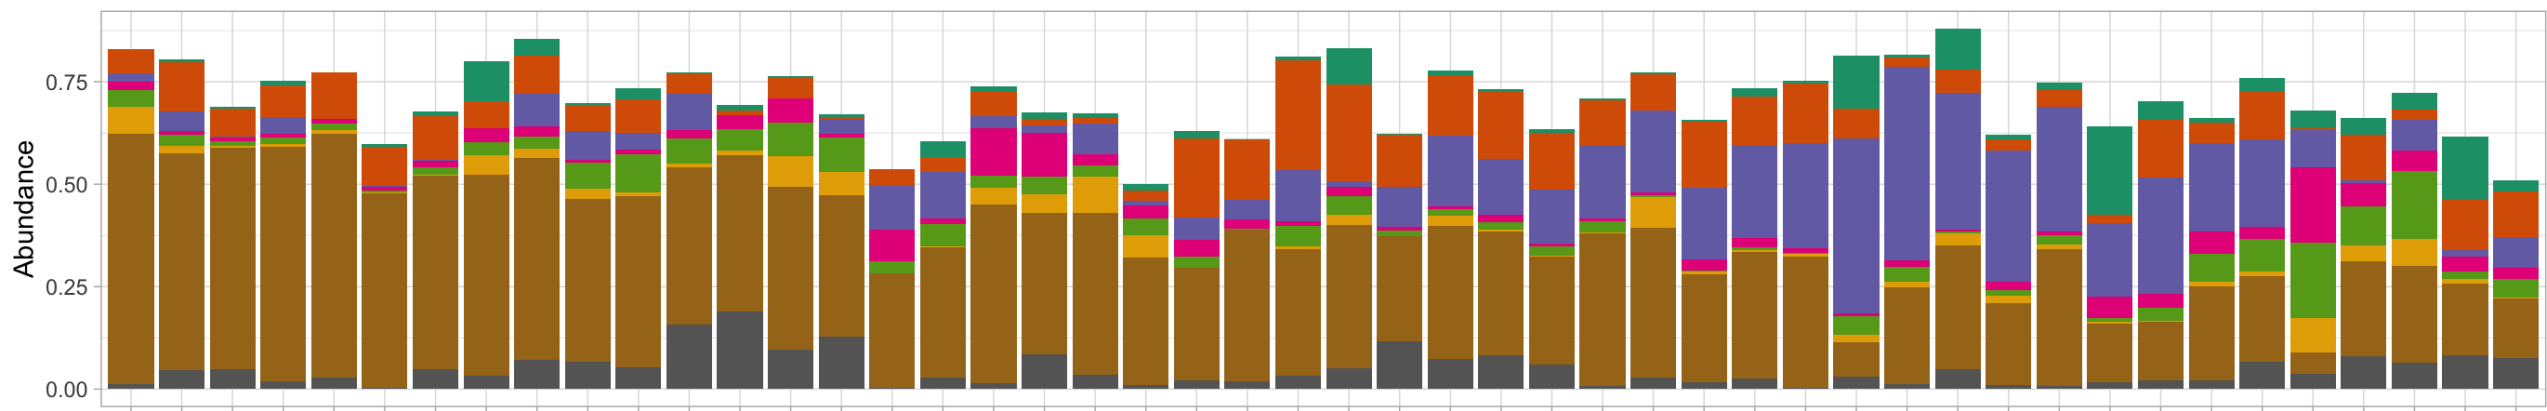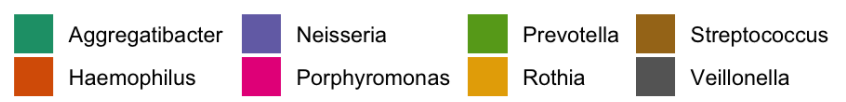

Source: https://medrxiv.org/content/10.1101/2020.06.02.20120444v1.full.pdf
